# Supplementary material for: Impact of Combined Exposure to Glyphosate and Diquat on Microbial Community Structure and Diversity in Lateritic Paddy Soil
Source: MDPI journal article supplement (doi:10.3390/su15118497), 2023-05-24
Supplement: s1 [file s1]

# Impact of Combined Exposure to Glyphosate and Diquat on Microbial Community Structure and Diversity in Lateritic Paddy Soil

Xiaoyu He <sup>1,2</sup>, Chunyuan Wu <sup>2,3,4,5</sup>, Huadong Tan <sup>2,3,4,5,\*</sup>, Xiao Deng <sup>2,3,4,5,\*</sup> and Yi Li <sup>2,3,4,5</sup>

<sup>1</sup> National Key Laboratory of Green Pesticide, Key Laboratory of Green Pesticide and Agricultural Bioengineering, Ministry of Education, Center for R&D of Fine Chemicals of Guizhou University, Guiyang 550025, China; gs.xiaoyuhe20@gzu.edu.cn

<sup>2</sup> Environment and Plant Protection Institute, Chinese Academy of Tropical Agricultural Sciences, Haikou 571101, China; wuchunyuangz@126.com (C.W.); wish.0310@163.com (Y.L.)

<sup>3</sup> Danzhou Scientific Observing and Experimental Station of Agro-Environment, Ministry of Agriculture and Rural Affairs, Danzhou 571737, China

<sup>4</sup> National Agricultural Experimental Station for Agricultural Environment, Danzhou 571737, China

<sup>5</sup> Hainan Engineering Research Center for Non-Point Source and Heavy Metal Pollution Control, Danzhou 571737, China

\* Correspondence: tanhuadong1991@163.com (H.T.); dx0928@foxmail.com (X.D.)

**Table S1** Primer information

| Type | Region | Primer name | Primer sequence        | Product length | Reference |
|------|--------|-------------|------------------------|----------------|-----------|
| 16S  | V1-V9  | 27F         | AGRGTTTGATYNTGGCTCAG   | ~1465          | [1]       |
|      |        | 1492R       | TASGGHTACCTTGTTASGACTT |                |           |
|      | V4     | 515F        | GTGYCAGCMGCCGCGGTAA    | ~292           | [1-2]     |
|      |        | 806R        | GGACTACNVGGGTWTCTAAT   |                |           |
|      | V3-V4  | 341F        | CCTACGGGNGGCWGCAG      | ~466           | [3]       |
|      |        | 806R        | GGACTACHVGGGTATCTAAT   |                |           |
|      | V4-V5  | 515F        | GTGCCAGCMGCCGCGGTAA    | ~412           | [4]       |
|      |        | 907R        | CCGTCAATTCCTTTGAGTTT   |                |           |
|      | V5-V7  | 799F        | AACMGGATTAGATACCKG     | ~414           | [5]       |
|      |        | 1193R       | ACGTCATCCCCACCTTCC     |                |           |
|      | V4-V5  | Arch519F    | CAGCMGCCGCGGTAA        | ~416           | [6]       |
|      |        | Arch915R    | GTGCTCCCCGCCAATTCCT    |                |           |
| 18S  | V4     | 528F        | GCGGTAATTCAGCTCCAA     | ~260           | [7]       |
|      |        | 706R        | AATCCRAGAATTCACCTCT    |                |           |
| ITS  | ITS1   | ITS1_F_KYO2 | TAGAGGAAGTAAAAGTCGTAA  | ~366           | [8]       |
|      |        | ITS86R      | TTCAAAGATTCGATGATTCAC  |                |           |
|      |        | ITS1-F      | CTTGGTCATTTAGAGGAAGTAA |                |           |
|      | ITS2   | ITS2        | GCTGCGTTCTTCATCGATGC   | ~321           | [9]       |
|      |        | ITS3_KYO2   | GATGAAGAACGYAGYRAA     |                |           |
|      |        | ITS4        | TCCTCCGCTTATTGATATGC   |                |           |

## Reference

- [1] Singer, E.; Bushnell, B.; Coleman-Derr, D.; Bowman, B.; Bowers, R.M.; Levy, A.; Gies, E.A.; Cheng, J.F.; Copeland A.; Klenk H.P.; Hallam S J.; Hugenholtz P.; Tringe, S.G.; Woyke, T. High-resolution phylogenetic microbial community profiling. *ISME J.* **2016**, *10*, 2020-2032.
- [2] Parada, A.E.; Needham, D.M.; Fuhrman, J.A. Every base matters: assessing small subunit rRNA primers for marine microbiomes with mock communities, time series and global field samples. *Environ. Microbiol.* **2016**, *18*, 1403–1414.
- [3] Apprill, A.; McNally, S.; Parsons, R.; Weber, L. Minor revision to V4 region SSU rRNA 806R gene primer greatly increases detection of SAR11 bacterioplankton. *Aquat. Microb. Ecol.* **2015**, *75*, 129–137.
- [4] Guo, M.; Wu F.; Hao, G.; Qi, Q.; Li, R.; Li N.; Wei L.M.; Chai T.J. *Bacillus subtilis* improves immunity and disease resistance in rabbits. *Front. Immunol.* **2017**, *8*, 354.
- [5] Fazzini R.A.B; Levican, G.; Parada, P. Acidithiobacillus thiooxidans secretome containing a newly described lipoprotein Licanantase enhances chalcopryrite bioleaching rate. *Appl. Microbiol. Biot.* **2011**, *89*, 771-780.
- [6] Beckers, B.; Op De Beeck, M.; Thijs, S.; Truyens, S.; Weyens, N.; Boerjan, W.; Vangronsveld, J. Performance of 16s rDNA Primer Pairs in the Study of Rhizosphere and Endosphere Bacterial Microbiomes in Metabarcoding Studies. *Front. Microbiol.* **2016**, *7*, 650.
- [7] Teske A.; Sørensen K.B. Uncultured archaea in deep marine subsurface sediments: have we caught them all?. *ISME J*, **2008**, *2*, 3.
- [8] Cheung, M.K.; Au, C.H.; Chu, K.H.; Kwan, H.S.; Wong, C.K. Composition and genetic diversity of picoeukaryotes in subtropical coastal waters as revealed by 454 pyrosequencing. *ISME J*, **2010**, *4*, 1053.
- [9] Scibetta, S.; Schena, L.; Abdelfattah, A.; Pangallo, S.; Cacciola, S. O. Selection and experimental evaluation of universal primers to study the fungal microbiome of higher plants. *Phytobiomes J.* **2018**, *2*, 225- 236.
- [10] Toju, H.; Tanabe, A. S.; Yamamoto, S.; & Sato, H. High-coverage ITS primers for the DNA-based identification of ascomycetes and basidiomycetes in environmental samples. *PloS one*, **2012**, *7*, e40863.

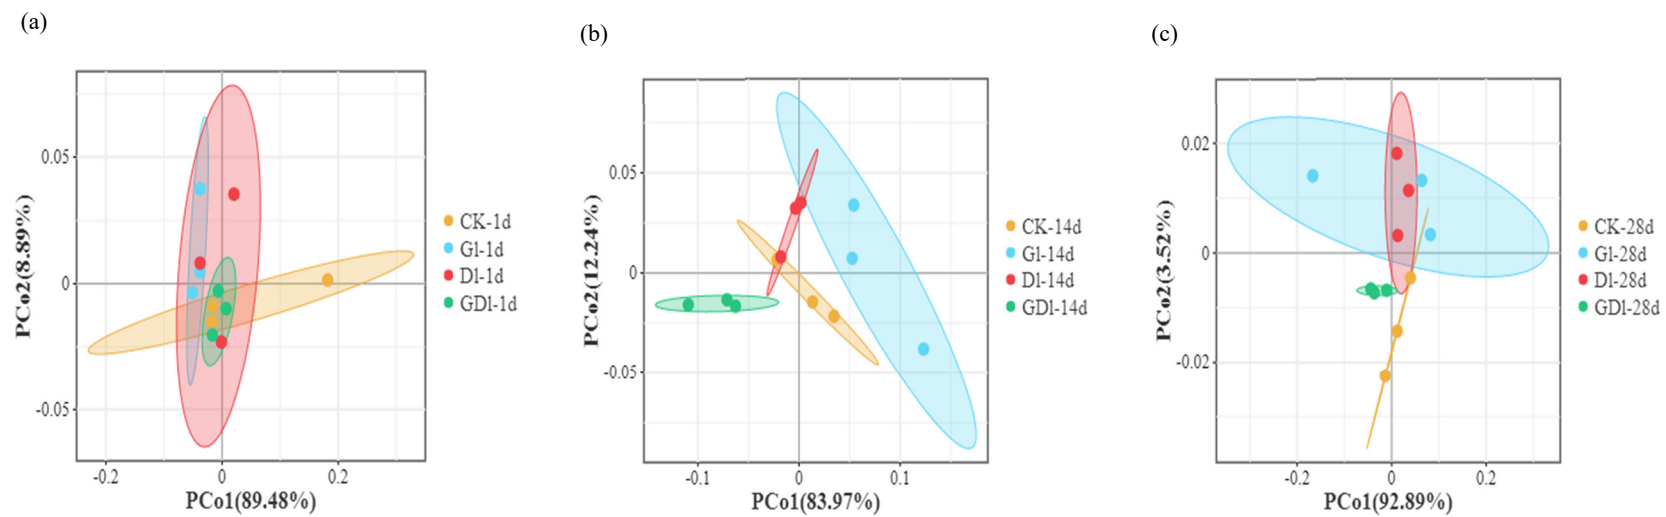

**Figure S1.** Principal coordinate analysis for the bacterial communities at the phylum level. .

(a)

## Cladogram

CK-1d  
DI-1d  
GDI-1d  
GI-1d

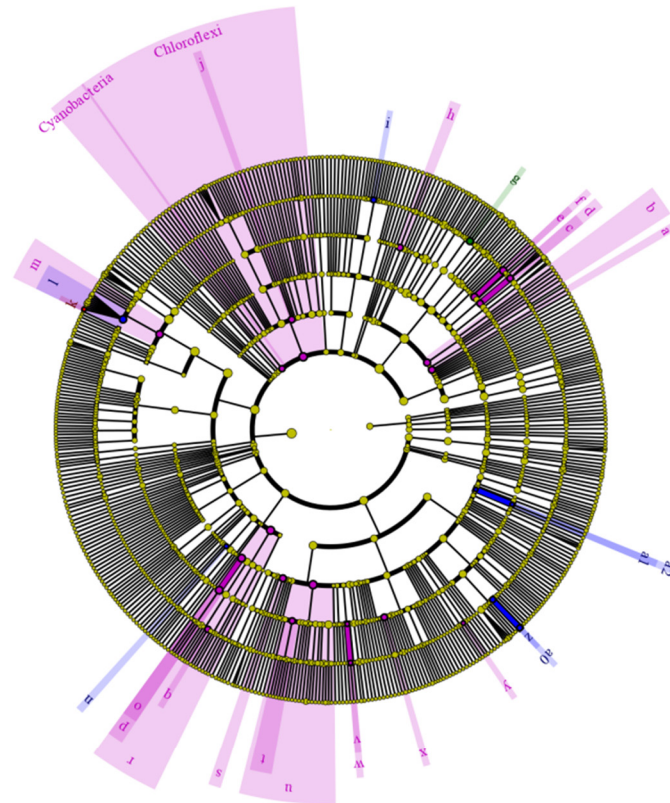

a: Subgroup\_6  
b: Acidimicrobiia  
c: Mycobacterium  
d: Mycobacteriaceae  
e: Acidothermus  
f: Acidothermaceae  
g: Dactylosporangium  
h: Solirubrobacteraceae  
i: Niasella  
j: KID\_96  
k: Streptomyces\_sp\_KP17  
l: Paenibacillus  
m: Paenibacillaceae  
n: S\_70  
o: Gemmataceae  
p: Gemmatales  
q: Singulisphaera  
r: Planctomycetacia  
s: Elsterales  
t: Beijerinckiacae  
u: Rhizobiales  
v: Rickettsia  
w: Rickettsiaceae  
x: Archangiaceae  
y: Desulfovira  
z: Ralstonia\_pickettii  
a0: Ralstonia  
a1: Steroidobacteraceae  
a2: Steroidobacterales

(b)

Cladogram

CK-1d  
Dm-1d  
GDm-1d  
Gm-1d

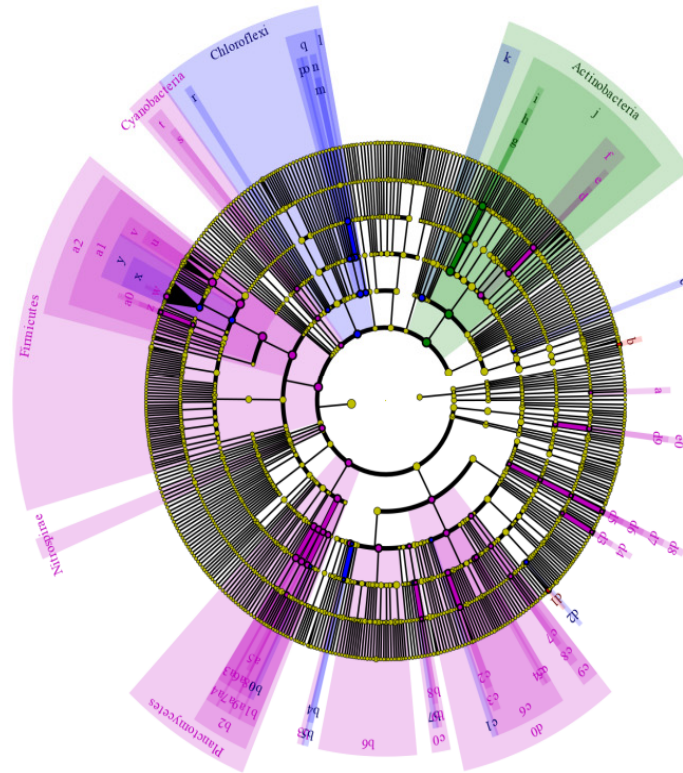

|                                |                               |                                                  |
|--------------------------------|-------------------------------|--------------------------------------------------|
| a: Methanocella                | x: Paenibacillus              | b9: Rickettsiaceae                               |
| b: Terracidiphilus_gabretensis | y: Paenibacillaceae           | c0: Rickettsiales                                |
| c: Subgroup_2                  | z: Rummeliibacillus_stabekisi | c1: MBNT15                                       |
| d: Acidothermus                | a0: Rummeliibacillus          | c2: Anaeromyxobacter                             |
| e: Acidothermaceae             | a1: Bacillales                | c3: Archangiaceae                                |
| f: Frankiales                  | a2: Bacilli                   | c4: bacteriap25                                  |
| g: Streptomyces                | a3: Gemmataceae               | c5: mle1_27                                      |
| h: Streptomycetaceae           | a4: Gemmatales                | c6: Myxococcales                                 |
| i: Streptomycetales            | a5: Singulisphaera            | c7: Desulfobacca                                 |
| j: Actinobacteria              | a6: Isosphaeraceae            | c8: Syntrophaceae                                |
| k: Thermoleophilia             | a7: Isosphaerales             | c9: Syntrophobacterales                          |
| l: AD3                         | a8: Pirellulaceae             | d0: Deltaproteobacteria                          |
| m: Anaerolineaceae             | a9: Pirellulales              | d1: Paraburkholderia_kuruiensis_subsp_kuruiensis |
| n: Anaerolineales              | b0: Gimesiaceae               | d2: Cupriavidus                                  |
| o: RBG_13_54_9                 | b1: Planctomycetales          | d3: Pantoea_dispersa                             |
| p: SBR1031                     | b2: Planctomycetacia          | d4: Pantoea                                      |
| q: Anaerolineae                | b3: Elsterales                | d5: Candidatus_Portiera_aleyrodarum              |
| r: P2_11E                      | b4: Holosporaceae             | d6: Candidatus_Portiera                          |
| s: Chloroplast                 | b5: Holosporales              | d7: Halomonadaceae                               |
| t: Oxyphotobacteria            | b6: Rhizobiales               | d8: Oceanospirillales                            |
| u: Bacillus                    | b7: Mitochondria              | d9: Candidatus_Xiphinematobacter                 |
| v: Bacillaceae                 | b8: Rickettsia                | e0: Xiphinematobacteraceae                       |
| w: Paenibacillus_sp_VKM_B_2647 |                               |                                                  |

(c)

## Cladogram

- █ CK-1d
- █ Dh-1d
- █ GDh-1d
- █ Gh-1d

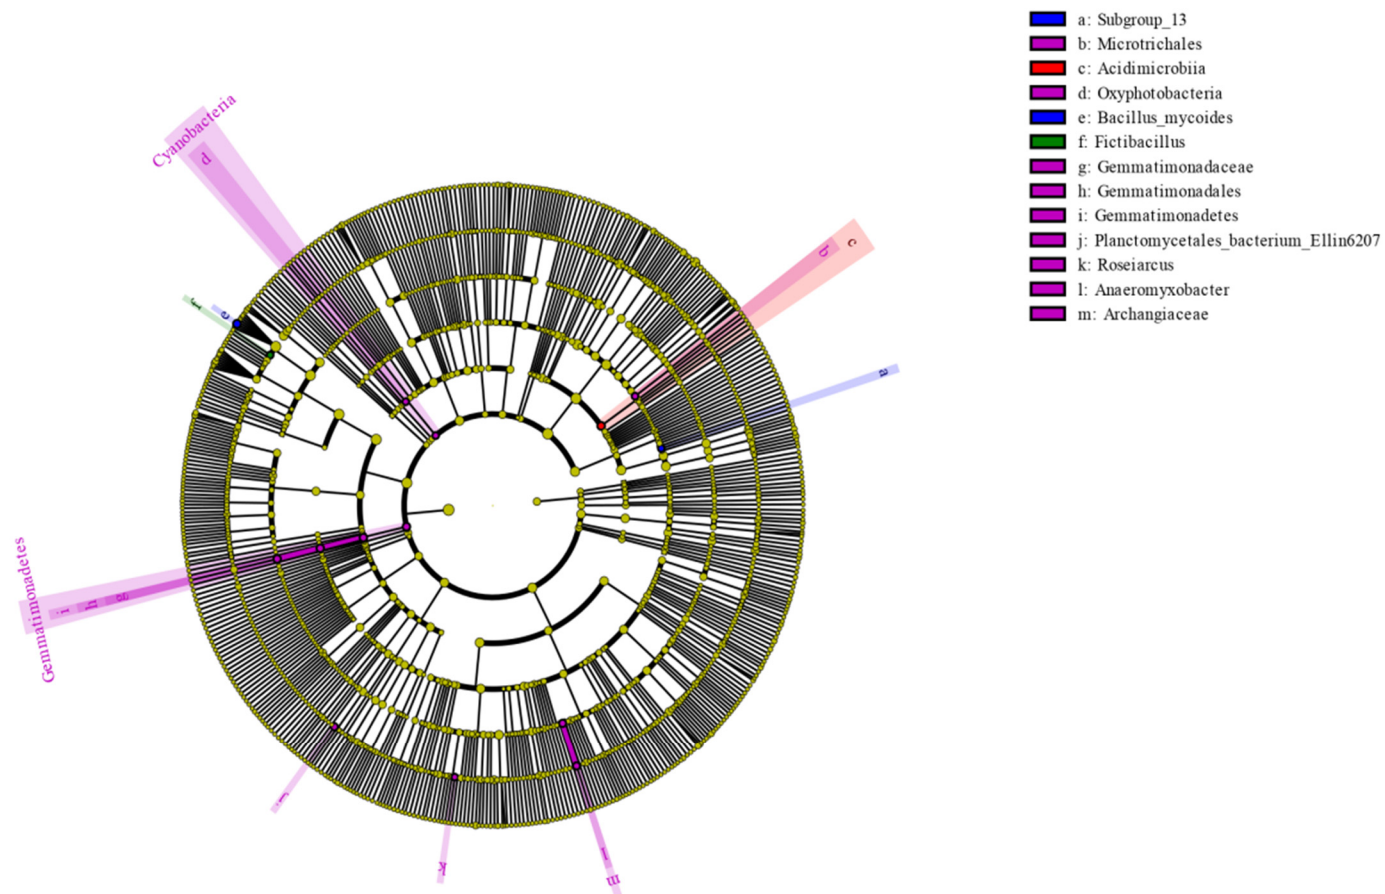



(d)

Cladogram

CK-14d  
Dm-14d  
GDm-14d  
Gm-14d

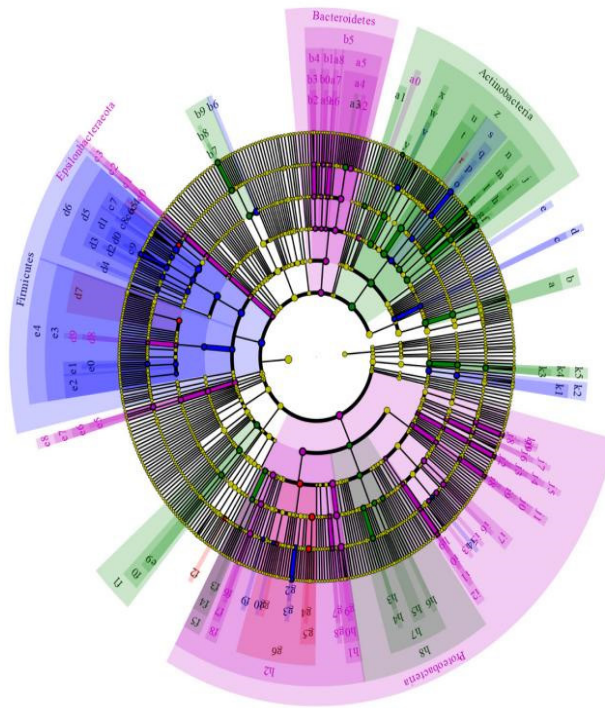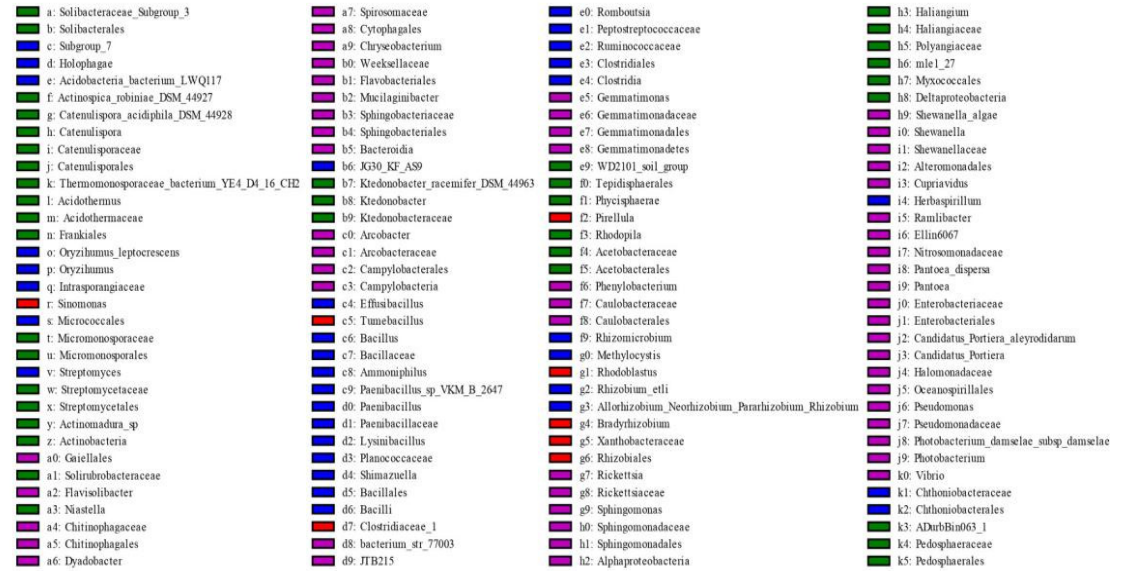



(e)

### Cladogram

CK-14d  
Dh-14d  
GDh-14d  
Gh-14d

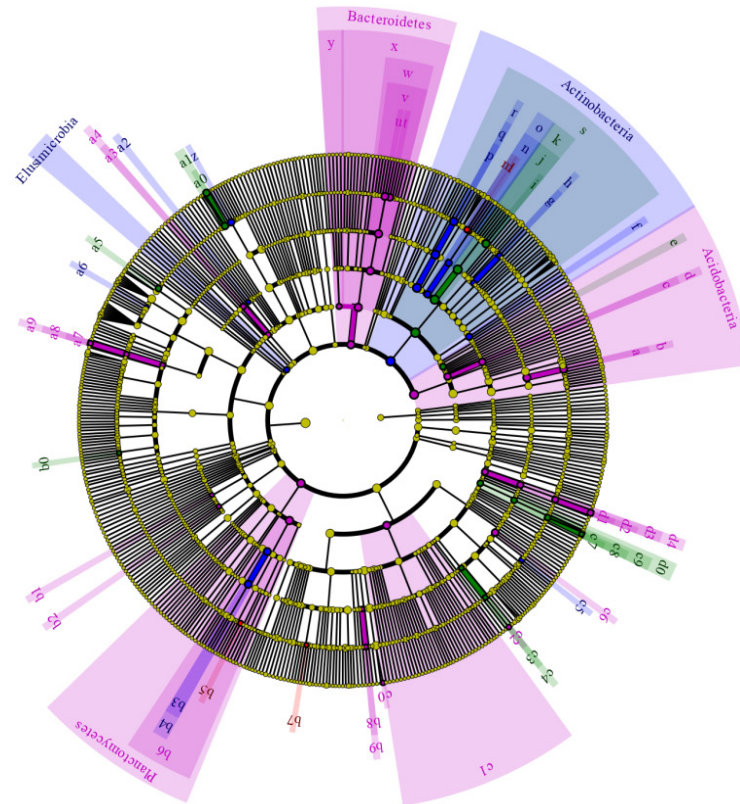

a: Candidatus\_Koribacter  
b: Koribacteraceae  
c: Subgroup\_7  
d: Holophagae  
e: Subgroup\_5  
f: IMCC26256  
g: Cellulomonas  
h: Cellulomonadaceae  
i: Dactylosporangium  
j: Micromonosporaceae  
k: Micromonosporales  
l: Marmoricola  
m: Nocardioidea  
n: Nocardioideae  
o: Propionibacteriales  
p: Streptomyces  
q: Streptomycetaceae  
r: Streptomycetales  
s: Actinobacteria  
t: Flavisolibacter  
u: Niasella  
v: Chitinophagaceae  
w: Chitinophagales  
x: Bacteroidia  
y: Ignavibacteria  
z: HSB\_OF53\_F07  
a0: Ktedonobacter\_racemifer\_DSM\_44963  
a1: Ktedonobacter  
a2: Gastranaerophilales  
a3: Chloroplast  
a4: Oxyphotobacteria  
a5: Effusibacillus  
a6: Oceanobacillus  
a7: Lactococcus\_garvieae\_subsp\_garvieae  
a8: Lactococcus  
a9: Streptococcaceae  
b0: Pseudobacteroides  
b1: Candidatus\_Roizmanbacteria  
b2: Candidatus\_Kaiserbacteria  
b3: Isosphaeraceae  
b4: Isosphaerales  
b5: Prellula  
b6: Planctomycetacia  
b7: Rhodoblastus  
b8: Rickettsia  
b9: Rickettsiaceae  
c0: Sphingomonas\_sediminicola  
c1: Deltaproteobacteria  
c2: Shewanella\_algae  
c3: Shewanella  
c4: Shewanellaceae  
c5: mle1\_7  
c6: SC\_I\_84  
c7: Acinetobacter\_calcoaceticus  
c8: Acinetobacter  
c9: Moraxellaceae  
d0: Pseudomonadales  
d1: Photobacterium\_damselae\_subsp\_damselae  
d2: Photobacterium  
d3: Vibrionaceae  
d4: Vibrionales

(f)

## Cladogram

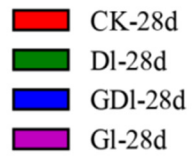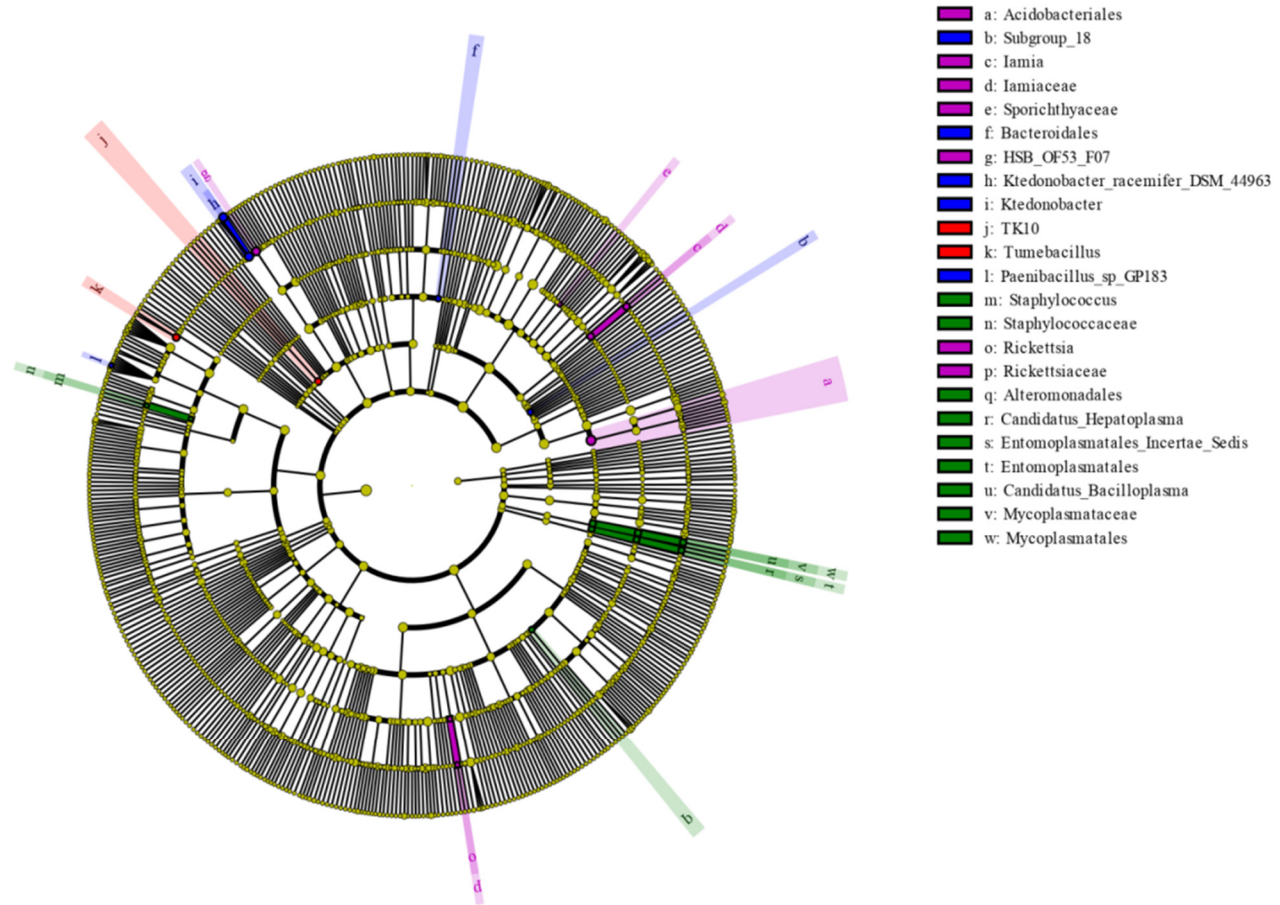

(g)

Cladogram

CK-28d  
Dm-28d  
GDm-28d  
Gm-28d

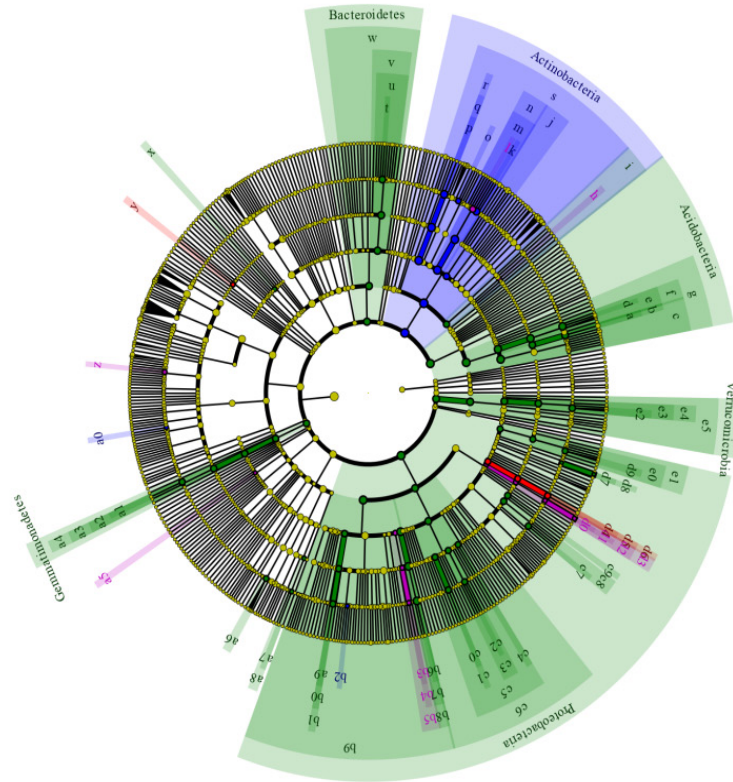

|                               |                                |                                            |
|-------------------------------|--------------------------------|--------------------------------------------|
| a: Candidatus_Koribacter      | y: Vermiphilaceae              | c2: Pajaroellobacter                       |
| b: Koribacteraceae            | z: Clostridium_sensu_stricto_3 | c3: Polyangiaceae                          |
| c: Acidobacteriales           | a0: Paeniciostriidium          | c4: mle1_27                                |
| d: Candidatus_Solibacter      | a1: Gemmatimonas               | c5: Myxococcales                           |
| e: Solibacteraceae_Subgroup_3 | a2: Gemmatimonadaceae          | c6: Deltaproteobacteria                    |
| f: Solibacterales             | a3: Gemmatimonadales           | c7: Ellin6067                              |
| g: Acidobacteriia             | a4: Gemmatimonadetes           | c8: Nitrosomonadaceae                      |
| h: actinobacterium_YJF2_33    | a5: Candidatus_Woesebacteria   | c9: SC_I_84                                |
| i: Acidimicrobiia             | a6: Gemmata                    | d0: Pantoea_dispersa                       |
| j: Micrococcales              | a7: Schleseria                 | d1: Pantoea                                |
| k: Dactylosporangium          | a8: Schleseriaceae             | d2: Enterobacteriaceae                     |
| l: Luedemannella              | a9: Reyranela                  | d3: Enterobacteriales                      |
| m: Micromonosporaceae         | b0: Reyraneliaceae             | d4: Acidibacter                            |
| n: Micromonosporales          | b1: Reyraneliales              | d5: Unknown_Family                         |
| o: Nocardioides               | b2: Rhodoblastus               | d6: Gammaproteobacteria_Incertae_Sedis     |
| p: Streptomyces               | b3: Rickettsia                 | d7: Photobacterium_damselae_subsp_damselae |
| q: Streptomycetaceae          | b4: Rickettsiaceae             | d8: Photobacterium                         |
| r: Streptomycetales           | b5: Rickettsiales              | d9: Dyella                                 |
| s: Actinobacteria             | b6: Sphingomonas               | e0: Rhodanobacteraceae                     |
| t: Nostella                   | b7: Sphingomonadaceae          | e1: Xanthomonadales                        |
| u: Chitinophagaceae           | b8: Sphingomonadales           | e2: ADurbBin063_1                          |
| v: Chitinophagales            | b9: Alphaproteobacteria        | e3: Pedosphaeraceae                        |
| w: Bacteroidia                | c0: Haliangium                 | e4: Pedosphaerales                         |
| x: bacterium_Ellin6543        | c1: Haliangiaceae              | e5: Verrucomicrobiae                       |

(h)

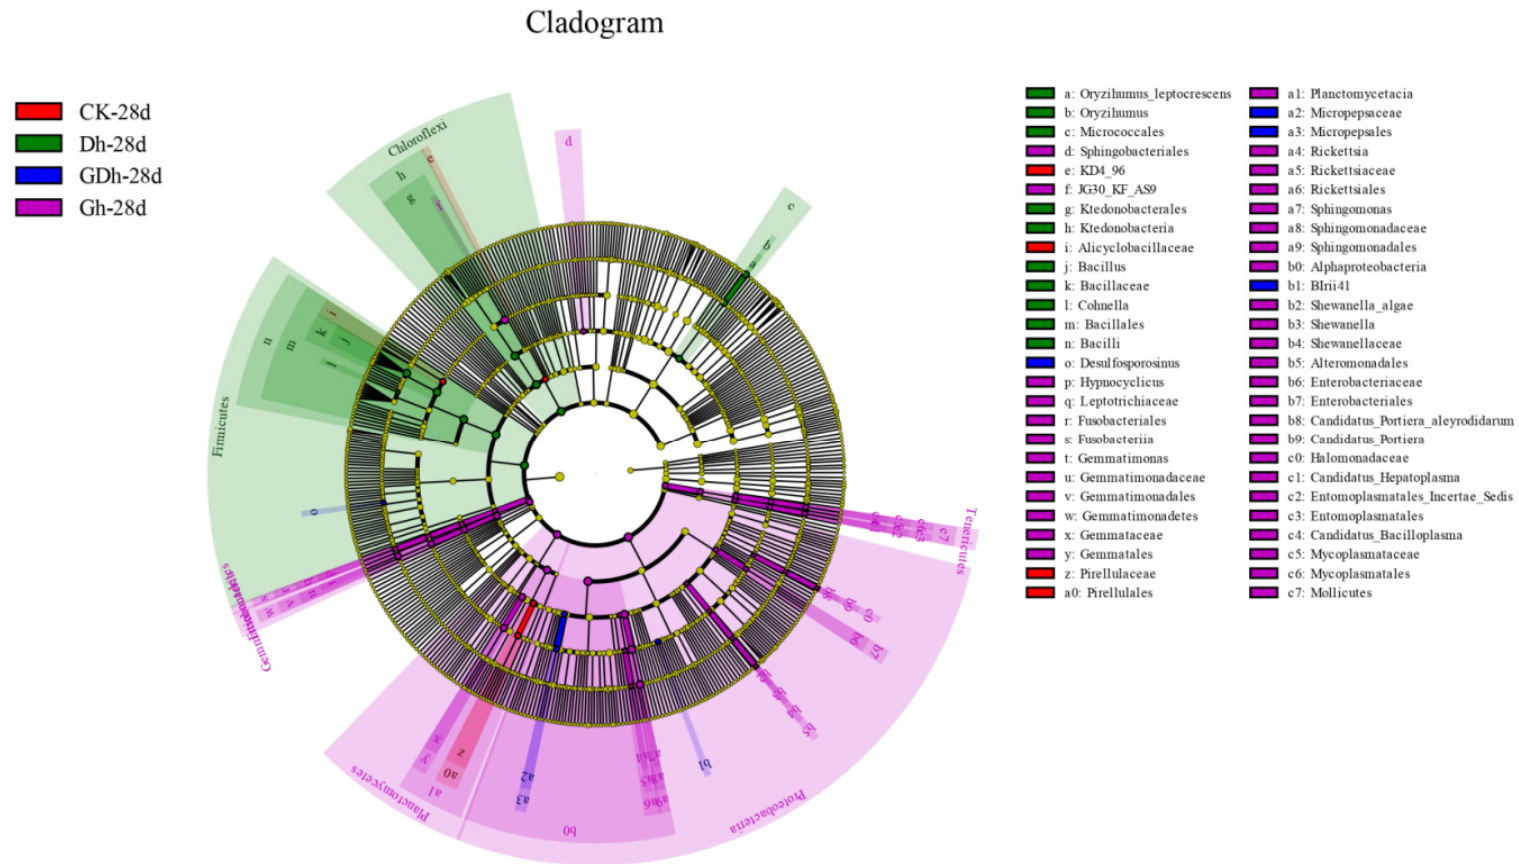

**Figure S2.** Cladograms of line discriminant analysis effect size (LEfSe) analyses of bacteria.

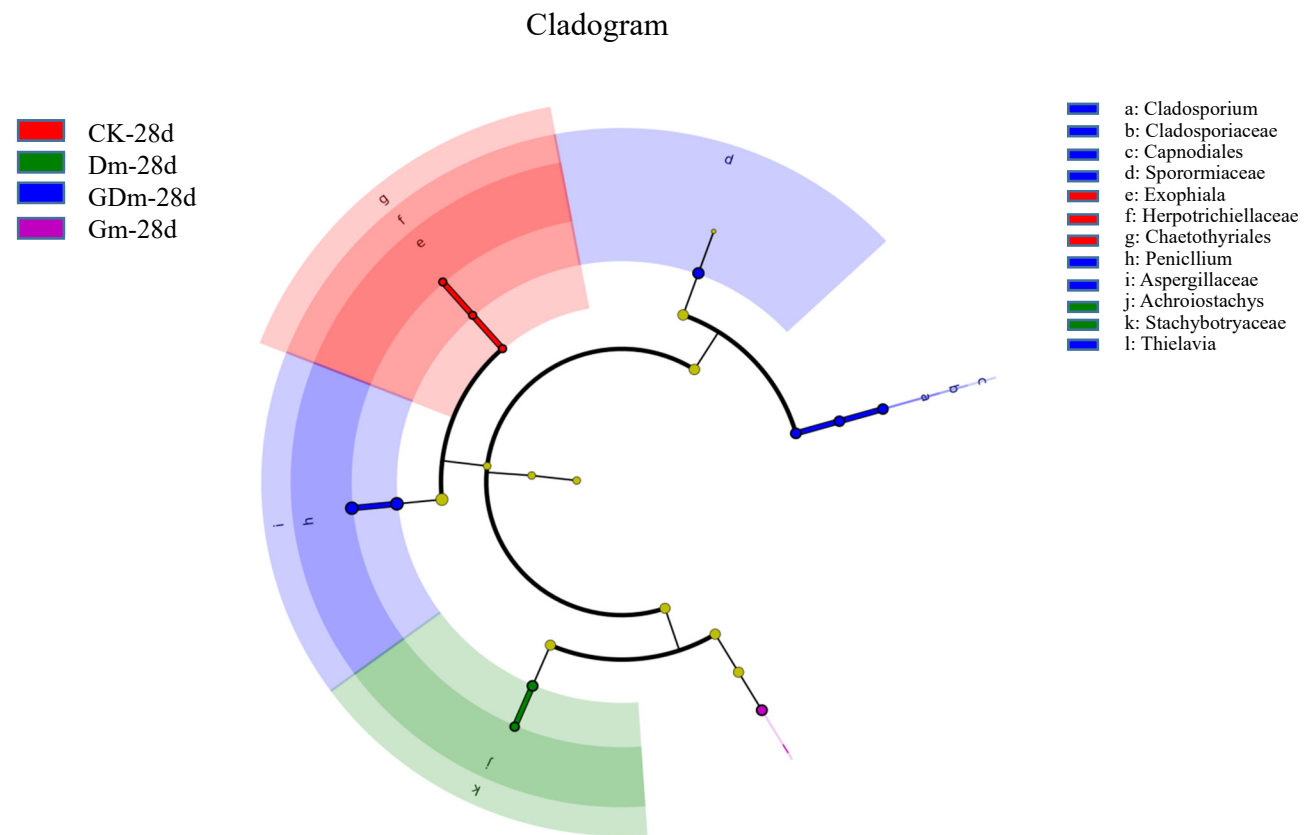

**Figure S3.** Cladograms of line discriminant analysis effect size (LEfSe) analyses of fungus.
